# Supplementary material
Source: PubMed Central journal article supplement (PMC9210452)
Supplement: NIHMS1589907-supplement-mmc2.pdf [file NIHMS1589907-supplement-mmc2.pdf]

This section is about your usual eating habits in the past year or so. This includes all meals or snacks, at home or in a restaurant or carry-out. We will ask you about different TYPES (low-fat, low-carb) at the end of the survey. Include all types (like low-fat, sugar-free). Later you can tell us which type you usually eat.

|                                                                               | NEVER                 | A FEW TIMES per YEAR  | ONCE per MONTH        | 2-3 TIMES per MONTH   | ONCE per WEEK         | 2 TIMES per WEEK      | 3-4 TIMES per WEEK    | 5-6 TIMES per WEEK    | EVERY DAY             | HOW MUCH ON THOSE DAYS<br>SEE PORTION SIZE PICTURES FOR A-B-C-D                                                 |
|-------------------------------------------------------------------------------|-----------------------|-----------------------|-----------------------|-----------------------|-----------------------|-----------------------|-----------------------|-----------------------|-----------------------|-----------------------------------------------------------------------------------------------------------------|
| Breakfast sandwiches <u>with</u> eggs, like Egg McMuffins                     | <input type="radio"/> | How many sandwiches in a day <input type="radio"/> 1 <input type="radio"/> 2                                    |
| Other eggs like scrambled, boiled or omelets ( <u>not</u> egg substitutes)    | <input type="radio"/> | How many eggs a day <input type="radio"/> 1 <input type="radio"/> 2 <input type="radio"/> 3                     |
| Breakfast sausage, including in sausage biscuits, or in breakfast sandwiches  | <input type="radio"/> | How many pieces <input type="radio"/> 1 <input type="radio"/> 2 <input type="radio"/> 3                         |
| Bacon                                                                         | <input type="radio"/> | How many pieces <input type="radio"/> 1 <input type="radio"/> 2 <input type="radio"/> 3 <input type="radio"/> 4 |
| Pancakes, waffles, French toast or Pop Tarts                                  | <input type="radio"/> | How many pieces <input type="radio"/> 1 <input type="radio"/> 2 <input type="radio"/> 3                         |
| Cooked cereals like oatmeal, grits or cream of wheat                          | <input type="radio"/> | Which bowl <input type="radio"/> B <input type="radio"/> C <input type="radio"/> D                              |
| Cold cereals, ANY KIND, like corn flakes, fiber cereals, or sweetened cereals | <input type="radio"/> | Which bowl <input type="radio"/> B <input type="radio"/> C <input type="radio"/> D                              |
| Milk or milk substitutes on cereal                                            | <input type="radio"/> |                                                                                                                 |
| Yogurt or frozen yogurt                                                       | <input type="radio"/> | Which bowl <input type="radio"/> B <input type="radio"/> C                                                      |
| Cheese, sliced cheese or cheese spread, including on sandwiches               | <input type="radio"/> | How many slices <input type="radio"/> 1 <input type="radio"/> 2 <input type="radio"/> 3                         |

How often do you eat the following foods all year round? Estimate your average for the whole year.

|                                                                                  |                       |                       |                       |                       |                       |                       |                       |                       |                       |                                                                                              |
|----------------------------------------------------------------------------------|-----------------------|-----------------------|-----------------------|-----------------------|-----------------------|-----------------------|-----------------------|-----------------------|-----------------------|----------------------------------------------------------------------------------------------|
| Bananas                                                                          | <input type="radio"/> | How many each time <input type="radio"/> 1/2 <input type="radio"/> 1                         |
| Apples or pears                                                                  | <input type="radio"/> | How many each time <input type="radio"/> 1/2 <input type="radio"/> 1 <input type="radio"/> 2 |
| Oranges or tangerines                                                            | <input type="radio"/> | How many each time <input type="radio"/> 1/2 <input type="radio"/> 1 <input type="radio"/> 2 |
| Grapefruit                                                                       | <input type="radio"/> | How much <input type="radio"/> A little <input type="radio"/> 1/2 <input type="radio"/> 1    |
| Peaches or nectarines, fresh                                                     | <input type="radio"/> | How many <input type="radio"/> 1/2 <input type="radio"/> 1 <input type="radio"/> 2           |
| Other fresh fruits like grapes, plums, honeydew, mango                           | <input type="radio"/> | How much <input type="radio"/> A <input type="radio"/> B <input type="radio"/> C             |
| Canned fruit like applesauce, fruit cocktail, canned peaches or canned pineapple | <input type="radio"/> | How much <input type="radio"/> A <input type="radio"/> B <input type="radio"/> C             |

How often do you eat each of the following 3 fruits, just during the summer months when they are in season?

|                                                 |                       |                       |                       |                       |                       |                       |                       |                       |                       |                                                                                                          |
|-------------------------------------------------|-----------------------|-----------------------|-----------------------|-----------------------|-----------------------|-----------------------|-----------------------|-----------------------|-----------------------|----------------------------------------------------------------------------------------------------------|
| Cantaloupe, <u>in season</u>                    | <input type="radio"/> | How much <input type="radio"/> 1/8 <input type="radio"/> 1/4 <input type="radio"/> 1/2                   |
| Strawberries or other berries, <u>in season</u> | <input type="radio"/> | How much <input type="radio"/> A <input type="radio"/> B <input type="radio"/> C                         |
| Watermelon, <u>in season</u>                    | <input type="radio"/> | How much <input type="radio"/> A <input type="radio"/> B <input type="radio"/> C <input type="radio"/> D |

How often do you eat each of the following vegetables all year round, including fresh, frozen, canned or in stir-fry, at home or in a restaurant?

|                                           |                       |                       |                       |                       |                       |                       |                       |                       |                       |                                                                                  |
|-------------------------------------------|-----------------------|-----------------------|-----------------------|-----------------------|-----------------------|-----------------------|-----------------------|-----------------------|-----------------------|----------------------------------------------------------------------------------|
| Broccoli                                  | <input type="radio"/> | How much <input type="radio"/> A <input type="radio"/> B <input type="radio"/> C |
| Carrots, or mixed vegetables with carrots | <input type="radio"/> | How much <input type="radio"/> A <input type="radio"/> B <input type="radio"/> C |
| Corn                                      | <input type="radio"/> | How much <input type="radio"/> A <input type="radio"/> B <input type="radio"/> C |

|                                                                                                     | NEVER                 | A FEW TIMES per YEAR  | ONCE per MONTH        | 2-3 TIMES per MONTH   | ONCE per WEEK         | 2 TIMES per WEEK      | 3-4 TIMES per WEEK    | 5-6 TIMES per WEEK    | EVERY DAY             |
|-----------------------------------------------------------------------------------------------------|-----------------------|-----------------------|-----------------------|-----------------------|-----------------------|-----------------------|-----------------------|-----------------------|-----------------------|
| Green beans or green peas                                                                           | <input type="radio"/> |
| Spinach (cooked)                                                                                    | <input type="radio"/> |
| Greens like collards, turnip greens, mustard greens                                                 | <input type="radio"/> |
| Sweet potatoes, yams                                                                                | <input type="radio"/> |
| French fries, home fries, hash browns                                                               | <input type="radio"/> |
| Potatoes <u>not</u> fried, including mashed, boiled, baked, or potato salad                         | <input type="radio"/> |
| Cole slaw, cabbage, Chinese cabbage                                                                 | <input type="radio"/> |
| Green salad, lettuce salad                                                                          | <input type="radio"/> |
| Raw tomatoes                                                                                        | <input type="radio"/> |
| Salad dressing, any kind, regular or low-fat                                                        | <input type="radio"/> |
| Any other vegetable, like squash, cauliflower, okra, cooked peppers                                 | <input type="radio"/> |
| Refried beans or <u>bean</u> burritos                                                               | <input type="radio"/> |
| Pinto beans, black beans, chili with beans, baked beans                                             | <input type="radio"/> |
| Vegetable stew (without meat)                                                                       | <input type="radio"/> |
| Vegetable soup, vegetable-beef soup, or tomato soup                                                 | <input type="radio"/> |
| Split pea, bean or lentil soup                                                                      | <input type="radio"/> |
| Any other soup including chicken noodle, cream soups, Cup-A-Soup, ramen                             | <input type="radio"/> |
| Pizza                                                                                               | <input type="radio"/> |
| Spaghetti, lasagna or other pasta <u>with</u> tomato sauce                                          | <input type="radio"/> |
| Macaroni and cheese                                                                                 | <input type="radio"/> |
| Other noodles like egg noodles, pasta salad, sopa seca                                              | <input type="radio"/> |
| Tofu or tempeh                                                                                      | <input type="radio"/> |
| Meat substitutes like veggie burgers, veggie chicken, vegetarian hot dogs or vegetarian lunch meats | <input type="radio"/> |

**HOW MUCH ON THOSE DAYS**  
SEE PORTION SIZE PICTURES FOR A-B-C-D

|                                                                                                                                     |                            |                             |                         |                         |  |  |  |  |  |
|-------------------------------------------------------------------------------------------------------------------------------------|----------------------------|-----------------------------|-------------------------|-------------------------|--|--|--|--|--|
| How much                                                                                                                            | <input type="radio"/> A    | <input type="radio"/> B     | <input type="radio"/> C |                         |  |  |  |  |  |
| How much                                                                                                                            | <input type="radio"/> A    | <input type="radio"/> B     | <input type="radio"/> C |                         |  |  |  |  |  |
| How much                                                                                                                            | <input type="radio"/> A    | <input type="radio"/> B     | <input type="radio"/> C |                         |  |  |  |  |  |
| How much                                                                                                                            | <input type="radio"/> A    | <input type="radio"/> B     | <input type="radio"/> C |                         |  |  |  |  |  |
| How much                                                                                                                            | <input type="radio"/> A    | <input type="radio"/> B     | <input type="radio"/> C | <input type="radio"/> D |  |  |  |  |  |
| How much                                                                                                                            | <input type="radio"/> A    | <input type="radio"/> B     | <input type="radio"/> C | <input type="radio"/> D |  |  |  |  |  |
| How much                                                                                                                            | <input type="radio"/> A    | <input type="radio"/> B     | <input type="radio"/> C |                         |  |  |  |  |  |
| How much                                                                                                                            | <input type="radio"/> B    | <input type="radio"/> C     | <input type="radio"/> D |                         |  |  |  |  |  |
| How much                                                                                                                            | <input type="radio"/> 1/4  | <input type="radio"/> 1/2   | <input type="radio"/> 1 |                         |  |  |  |  |  |
| How many tablespoons                                                                                                                | <input type="radio"/> 1    | <input type="radio"/> 2     | <input type="radio"/> 3 | <input type="radio"/> 4 |  |  |  |  |  |
| How much                                                                                                                            | <input type="radio"/> A    | <input type="radio"/> B     | <input type="radio"/> C | <input type="radio"/> D |  |  |  |  |  |
| How much of the <u>beans</u>                                                                                                        | <input type="radio"/> A    | <input type="radio"/> B     | <input type="radio"/> C |                         |  |  |  |  |  |
| How much                                                                                                                            | <input type="radio"/> A    | <input type="radio"/> B     | <input type="radio"/> C | <input type="radio"/> D |  |  |  |  |  |
| Which bowl                                                                                                                          | <input type="radio"/> B    | <input type="radio"/> C     | <input type="radio"/> D |                         |  |  |  |  |  |
| Which bowl                                                                                                                          | <input type="radio"/> B    | <input type="radio"/> C     | <input type="radio"/> D |                         |  |  |  |  |  |
| Which bowl                                                                                                                          | <input type="radio"/> B    | <input type="radio"/> C     | <input type="radio"/> D |                         |  |  |  |  |  |
| Which bowl                                                                                                                          | <input type="radio"/> B    | <input type="radio"/> C     | <input type="radio"/> D |                         |  |  |  |  |  |
| How many slices                                                                                                                     | <input type="radio"/> 1    | <input type="radio"/> 2     | <input type="radio"/> 3 | <input type="radio"/> 4 |  |  |  |  |  |
| How much                                                                                                                            | <input type="radio"/> B    | <input type="radio"/> C     | <input type="radio"/> D |                         |  |  |  |  |  |
| How much                                                                                                                            | <input type="radio"/> B    | <input type="radio"/> C     | <input type="radio"/> D |                         |  |  |  |  |  |
| How much                                                                                                                            | <input type="radio"/> B    | <input type="radio"/> C     | <input type="radio"/> D |                         |  |  |  |  |  |
| How much                                                                                                                            | <input type="radio"/> A    | <input type="radio"/> B     | <input type="radio"/> C |                         |  |  |  |  |  |
| How many patties or dogs                                                                                                            | <input type="radio"/> 1    | <input type="radio"/> 2     |                         |                         |  |  |  |  |  |
| <b>Do you ever eat chicken, meat or fish?</b> <input type="radio"/> Yes <input type="radio"/> No IF NO, SKIP TO BREADS ON NEXT PAGE |                            |                             |                         |                         |  |  |  |  |  |
| How much                                                                                                                            | <input type="radio"/> 1 sm | <input type="radio"/> 1 lrg | <input type="radio"/> 2 |                         |  |  |  |  |  |
| How many hotdogs                                                                                                                    | <input type="radio"/> 1    | <input type="radio"/> 2     | <input type="radio"/> 3 |                         |  |  |  |  |  |

PLEASE DO NOT WRITE IN THIS AREA

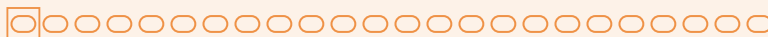

|                                                                                                        | NEVER                 | A FEW TIMES per YEAR  | ONCE per MONTH        | 2-3 TIMES per MONTH   | ONCE per WEEK         | 2 TIMES per WEEK      | 3-4 TIMES per WEEK    | 5-6 TIMES per WEEK    | EVERY DAY             |
|--------------------------------------------------------------------------------------------------------|-----------------------|-----------------------|-----------------------|-----------------------|-----------------------|-----------------------|-----------------------|-----------------------|-----------------------|
| Lunch meat like bologna, sliced ham, turkey bologna, or any other lunch meat                           | <input type="radio"/> |
| Meat loaf, meat balls                                                                                  | <input type="radio"/> |
| Steak, roast beef, or beef in frozen dinners or sandwiches                                             | <input type="radio"/> |
| Tacos, burritos, enchiladas, tamales, with meat or chicken                                             | <input type="radio"/> |
| Ribs, spareribs                                                                                        | <input type="radio"/> |
| Pork chops, pork roasts, cooked ham (including for breakfast)                                          | <input type="radio"/> |
| Veal, lamb, deer meat                                                                                  | <input type="radio"/> |
| Liver, including chicken livers or liverwurst                                                          | <input type="radio"/> |
| Pigs feet, neck bones, oxtails, tongue                                                                 | <input type="radio"/> |
| Menudo, pozole, caldo de res, sancocho, ajiao                                                          | <input type="radio"/> |
| Any other beef or pork dish, like beef stew, beef pot pie, corned beef hash, Hamburger Helper          | <input type="radio"/> |
| Fried chicken, including chicken nuggets, wings, chicken patty                                         | <input type="radio"/> |
| Roasted or broiled chicken or turkey                                                                   | <input type="radio"/> |
| Any other chicken dish, like chicken stew, chicken with noodles, chicken salad, Chinese chicken dishes | <input type="radio"/> |
| Oysters                                                                                                | <input type="radio"/> |
| Shellfish like shrimp, scallops, crabs                                                                 | <input type="radio"/> |
| Tuna, tuna salad, tuna casserole                                                                       | <input type="radio"/> |
| Fried fish or fish sandwich                                                                            | <input type="radio"/> |
| Other fish, <u>not</u> fried                                                                           | <input type="radio"/> |

### HOW MUCH ON THOSE DAYS

SEE PORTION SIZE PICTURES FOR A-B-C-D

|                               |                       |                       |                       |                       |
|-------------------------------|-----------------------|-----------------------|-----------------------|-----------------------|
| How many <b>slices</b>        | <input type="radio"/> | <input type="radio"/> | <input type="radio"/> | <input type="radio"/> |
|                               | 1                     | 2                     | 3                     | 4                     |
| How <b>much</b>               | <input type="radio"/> | <input type="radio"/> | <input type="radio"/> | <input type="radio"/> |
|                               | A                     | B                     | C                     | D                     |
| How <b>much</b>               | <input type="radio"/> | <input type="radio"/> | <input type="radio"/> | <input type="radio"/> |
|                               | A                     | B                     | C                     | D                     |
| How <b>much</b>               | <input type="radio"/> | <input type="radio"/> | <input type="radio"/> | <input type="radio"/> |
|                               | A                     | B                     | C                     | D                     |
| How <b>much</b>               | <input type="radio"/> | <input type="radio"/> | <input type="radio"/> | <input type="radio"/> |
|                               | A                     | B                     | C                     | D                     |
| How <b>much</b>               | <input type="radio"/> | <input type="radio"/> | <input type="radio"/> | <input type="radio"/> |
|                               | A                     | B                     | C                     | D                     |
| How <b>much</b>               | <input type="radio"/> | <input type="radio"/> | <input type="radio"/> | <input type="radio"/> |
|                               | A                     | B                     | C                     | D                     |
| How <b>much</b>               | <input type="radio"/> | <input type="radio"/> | <input type="radio"/> | <input type="radio"/> |
|                               | A                     | B                     | C                     | D                     |
| Which <b>bowls</b>            | <input type="radio"/> | <input type="radio"/> | <input type="radio"/> | <input type="radio"/> |
|                               | B                     | C                     | D                     |                       |
| How <b>much</b>               | <input type="radio"/> | <input type="radio"/> | <input type="radio"/> | <input type="radio"/> |
|                               | B                     | C                     | D                     |                       |
| How many <b>medium pieces</b> | <input type="radio"/> | <input type="radio"/> | <input type="radio"/> | <input type="radio"/> |
|                               | 1                     | 2 pcs/6 nugts         | 3                     |                       |
| How <b>much</b>               | <input type="radio"/> | <input type="radio"/> | <input type="radio"/> | <input type="radio"/> |
|                               | A                     | B                     | C                     |                       |
| How <b>much</b>               | <input type="radio"/> | <input type="radio"/> | <input type="radio"/> | <input type="radio"/> |
|                               | B                     | C                     | D                     |                       |
| How <b>much</b>               | <input type="radio"/> | <input type="radio"/> | <input type="radio"/> | <input type="radio"/> |
|                               | A                     | B                     | C                     |                       |
| How <b>much of the tuna</b>   | <input type="radio"/> | <input type="radio"/> | <input type="radio"/> | <input type="radio"/> |
|                               | A                     | B                     | C                     |                       |
| How <b>much</b>               | <input type="radio"/> | <input type="radio"/> | <input type="radio"/> | <input type="radio"/> |
|                               | A                     | B                     | C                     |                       |
| How <b>much</b>               | <input type="radio"/> | <input type="radio"/> | <input type="radio"/> | <input type="radio"/> |
|                               | A                     | B                     | C                     |                       |

### BREADS

|                                                                                               |                       |                       |                       |                       |                       |                       |                       |                       |                       |
|-----------------------------------------------------------------------------------------------|-----------------------|-----------------------|-----------------------|-----------------------|-----------------------|-----------------------|-----------------------|-----------------------|-----------------------|
| Biscuits, muffins, croissants ( <u>not</u> counting breakfast sandwiches with eggs)           | <input type="radio"/> |
| How <b>many</b>                                                                               | <input type="radio"/> | <input type="radio"/> | <input type="radio"/> | <input type="radio"/> |                       |                       |                       |                       |                       |
|                                                                                               | 1 sm                  | 1 med                 | 2                     |                       |                       |                       |                       |                       |                       |
| Hamburger buns, hotdog buns, hoagie buns, submarines                                          | <input type="radio"/> |
| How <b>many</b>                                                                               | <input type="radio"/> | <input type="radio"/> | <input type="radio"/> | <input type="radio"/> |                       |                       |                       |                       |                       |
|                                                                                               | 1                     | 2                     |                       |                       |                       |                       |                       |                       |                       |
| Bagels, English muffins, dinner rolls                                                         | <input type="radio"/> |
| How <b>many</b>                                                                               | <input type="radio"/> | <input type="radio"/> | <input type="radio"/> | <input type="radio"/> |                       |                       |                       |                       |                       |
|                                                                                               | 1/2                   | 1                     |                       |                       |                       |                       |                       |                       |                       |
| Tortillas ( <u>not</u> counting those eaten in tacos or burritos)                             | <input type="radio"/> |
| How <b>many in a day</b>                                                                      | <input type="radio"/> | <input type="radio"/> | <input type="radio"/> | <input type="radio"/> |                       |                       |                       |                       |                       |
|                                                                                               | 1                     | 2                     | 3                     | 4                     |                       |                       |                       |                       |                       |
| Corn bread, corn muffins, hush puppies                                                        | <input type="radio"/> |
| How <b>many pieces in a day</b>                                                               | <input type="radio"/> | <input type="radio"/> | <input type="radio"/> | <input type="radio"/> |                       |                       |                       |                       |                       |
|                                                                                               | 1/2                   | 1                     | 2                     |                       |                       |                       |                       |                       |                       |
| Any other bread or toast, including white, dark, whole wheat, and what you have in sandwiches | <input type="radio"/> |
| How <b>many slices in a day</b>                                                               | <input type="radio"/> | <input type="radio"/> | <input type="radio"/> | <input type="radio"/> |                       |                       |                       |                       |                       |
|                                                                                               | 1                     | 2                     | 3                     | 4                     |                       |                       |                       |                       |                       |
| Rice, or dishes made with rice                                                                | <input type="radio"/> |
| How <b>much in a day</b>                                                                      | <input type="radio"/> | <input type="radio"/> | <input type="radio"/> | <input type="radio"/> |                       |                       |                       |                       |                       |
|                                                                                               | B                     | C                     | D                     |                       |                       |                       |                       |                       |                       |

|                                                                                                | NEVER                 | A FEW TIMES per YEAR  | ONCE per MONTH        | 2-3 TIMES per MONTH   | ONCE per WEEK         | 2 TIMES per WEEK      | 3-4 TIMES per WEEK    | 5-6 TIMES per WEEK    | EVERY DAY             | HOW MUCH ON THOSE DAYS<br>SEE PORTION SIZE PICTURES FOR A-B-C-D                                                                   |
|------------------------------------------------------------------------------------------------|-----------------------|-----------------------|-----------------------|-----------------------|-----------------------|-----------------------|-----------------------|-----------------------|-----------------------|-----------------------------------------------------------------------------------------------------------------------------------|
| Margarine ( <u>not</u> butter) on bread or on vegetables                                       | <input type="radio"/> | How many <b>pats (tsp)</b> <input type="radio"/> 1 <input type="radio"/> 2 <input type="radio"/> 3 <input type="radio"/> 4        |
| Butter ( <u>not</u> margarine) on bread or on vegetables                                       | <input type="radio"/> | How many <b>pats (tsp)</b> <input type="radio"/> 1 <input type="radio"/> 2 <input type="radio"/> 3 <input type="radio"/> 4        |
| Energy bars, like Power Bars, Clif bars, Balance, Luna, Atkins bars                            | <input type="radio"/> | How <b>many</b> <input type="radio"/> 1 <input type="radio"/> 2                                                                   |
| Breakfast bars, cereal bars, granola bars ( <u>not</u> energy bars)                            | <input type="radio"/> | How <b>many</b> <input type="radio"/> 1 <input type="radio"/> 2                                                                   |
| Peanuts, sunflower seeds, other nuts or seeds                                                  | <input type="radio"/> | How <b>much</b> <input type="radio"/> A <input type="radio"/> B <input type="radio"/> C                                           |
| Peanut butter                                                                                  | <input type="radio"/> | How many <b>tablespoons</b> <input type="radio"/> 1/2 <input type="radio"/> 1 <input type="radio"/> 2 <input type="radio"/> 3     |
| Snack chips like potato chips, tortilla chips, Fritos, Doritos, popcorn ( <u>not</u> pretzels) | <input type="radio"/> | How <b>much</b> <input type="radio"/> A <input type="radio"/> B <input type="radio"/> C <input type="radio"/> D                   |
| Crackers, like Saltines, Cheez-Its, or any other snack cracker                                 | <input type="radio"/> | How <b>much</b> <input type="radio"/> A <input type="radio"/> B <input type="radio"/> C                                           |
| Jelly, jam                                                                                     | <input type="radio"/> | How many <b>tablespoons</b> <input type="radio"/> 1/2 <input type="radio"/> 1 <input type="radio"/> 2                             |
| Mayonnaise, sandwich spreads                                                                   | <input type="radio"/> | How many <b>tablespoons</b> <input type="radio"/> 1/2 <input type="radio"/> 1 <input type="radio"/> 2                             |
| Catsup, salsa or chile peppers                                                                 | <input type="radio"/> | How many <b>tablespoons</b> <input type="radio"/> 1/2 <input type="radio"/> 1 <input type="radio"/> 2 <input type="radio"/> 3     |
| Mustard, barbecue sauce, soy sauce, gravy, other sauces                                        | <input type="radio"/> | How many <b>tablespoons</b> <input type="radio"/> 1/2 <input type="radio"/> 1 <input type="radio"/> 2 <input type="radio"/> 3     |
| Donuts                                                                                         | <input type="radio"/> | How <b>many</b> <input type="radio"/> 1 <input type="radio"/> 2 <input type="radio"/> 3                                           |
| Cake, or snack cakes like cupcakes, Ho-Hos, Entenmann's, or any other pastry                   | <input type="radio"/> | How many <b>pieces</b> <input type="radio"/> 1 sm <input type="radio"/> 1 med <input type="radio"/> 2 <input type="radio"/> 3     |
| Cookies                                                                                        | <input type="radio"/> | How <b>many</b> <input type="radio"/> 1-2 <input type="radio"/> 3-4 <input type="radio"/> 5-6 <input type="radio"/> 7+            |
| Ice cream, ice cream bars                                                                      | <input type="radio"/> | How <b>much</b> <input type="radio"/> B <input type="radio"/> C <input type="radio"/> D                                           |
| Chocolate syrup or sauce (like in milk or on ice cream)                                        | <input type="radio"/> |                                                                                                                                   |
| Pumpkin pie, sweet potato pie                                                                  | <input type="radio"/> | How many <b>pieces</b> <input type="radio"/> 1/2 <input type="radio"/> 1 <input type="radio"/> 2                                  |
| Any other pie including fast food pies or snack pies                                           | <input type="radio"/> | How many <b>pieces</b> <input type="radio"/> 1/2 <input type="radio"/> 1 <input type="radio"/> 2                                  |
| Chocolate candy like candy bars, M&Ms, Reeses                                                  | <input type="radio"/> | How <b>much</b> <input type="radio"/> 1 mini <input type="radio"/> 1 med <input type="radio"/> 1 lrg <input type="radio"/> 1 king |
| Any other candy, <u>not</u> chocolate, like hard candy, Lifesavers, Skittles, Starburst        | <input type="radio"/> | How <b>much</b> in a day <input type="radio"/> 1-2 pcs <input type="radio"/> 1/2 pkg <input type="radio"/> 1 pkg                  |

|                                                                                      | NEVER                 | A FEW TIMES per YEAR  | ONCE per MONTH        | 2-3 TIMES per MONTH   | ONCE per WEEK         | 2 TIMES per WEEK      | 3-4 TIMES per WEEK    | 5-6 TIMES per WEEK    | EVERY DAY             | HOW MUCH on the days you drink it?                                                                |
|--------------------------------------------------------------------------------------|-----------------------|-----------------------|-----------------------|-----------------------|-----------------------|-----------------------|-----------------------|-----------------------|-----------------------|---------------------------------------------------------------------------------------------------|
| Glasses of milk (any kind, including soy), <u>not</u> counting on cereal or coffee   | <input type="radio"/> | How many <b>GLASSES</b> <input type="radio"/> 1 <input type="radio"/> 2 <input type="radio"/> 3   |
| Drinks like Slim Fast, Sego, Slender, Ensure or Atkins                               | <input type="radio"/> | How many <b>CANS OR GLASSES</b> <input type="radio"/> 1 <input type="radio"/> 2                   |
| Tomato juice or V-8 juice                                                            | <input type="radio"/> | How many <b>GLASSES</b> <input type="radio"/> 1/2 <input type="radio"/> 1 <input type="radio"/> 2 |
| Real 100% orange juice or grapefruit juice. Don't count orange soda or Sunny Delight | <input type="radio"/> | How many <b>GLASSES</b> <input type="radio"/> 1/2 <input type="radio"/> 1 <input type="radio"/> 2 |
| Apple juice, grape juice, pineapple juice or fruit smoothies                         | <input type="radio"/> | How many <b>GLASSES</b> <input type="radio"/> 1/2 <input type="radio"/> 1 <input type="radio"/> 2 |



**If you eat the following foods, what type do you usually eat? MARK ONLY ONE ANSWER FOR EACH QUESTION**

|                                                     |                                                     |                                                    |                                               |                                          |
|-----------------------------------------------------|-----------------------------------------------------|----------------------------------------------------|-----------------------------------------------|------------------------------------------|
| <b>Milk</b>                                         | <input type="radio"/> Whole milk                    | <input type="radio"/> Low-fat 1% milk              | <input type="radio"/> Soy milk                | <input type="radio"/> Don't drink        |
|                                                     | <input type="radio"/> Reduced-fat 2% milk           | <input type="radio"/> Non-fat milk                 | <input type="radio"/> Rice milk               |                                          |
| <b>Slim Fast, Sego, Slender or Ensure</b>           |                                                     | <input type="radio"/> Low-Carb like Atkins         | <input type="radio"/> Regular                 | <input type="radio"/> Don't drink        |
| <b>Orange juice</b>                                 | <input type="radio"/> Calcium-fortified             | <input type="radio"/> Not calcium-fortified        | <input type="radio"/> I don't know            | <input type="radio"/> Don't drink        |
| <b>Soda or pop</b>                                  | <input type="radio"/> Diet soda, low-calorie        | <input type="radio"/> Regular                      | <input type="radio"/> Don't drink             |                                          |
| <b>Iced tea</b>                                     | <input type="radio"/> Homemade, no sugar            | <input type="radio"/> Homemade, w/sugar            | <input type="radio"/> Bottled, no sugar       | <input type="radio"/> Bottled, regular   |
|                                                     |                                                     |                                                    |                                               | <input type="radio"/> Don't drink        |
| <b>Beer</b>                                         | <input type="radio"/> Regular beer                  | <input type="radio"/> Light beer                   | <input type="radio"/> Low-Carb beer           | <input type="radio"/> Non-alcoholic beer |
|                                                     |                                                     |                                                    |                                               | <input type="radio"/> Don't drink        |
| <b>Hamburgers or cheeseburgers</b>                  |                                                     | <input type="radio"/> Hamburgers                   | <input type="radio"/> Cheeseburgers           | <input type="radio"/> Don't eat          |
| <b>Hot dogs</b>                                     | <input type="radio"/> Low fat or turkey dogs        | <input type="radio"/> Regular hot dogs             | <input type="radio"/> Don't eat               |                                          |
| <b>Lunch meats</b>                                  | <input type="radio"/> Low-fat or turkey lunch meats | <input type="radio"/> Regular lunch meats          | <input type="radio"/> Don't eat               |                                          |
| <b>Spaghetti or lasagna</b>                         | <input type="radio"/> Meatless                      | <input type="radio"/> With meat sauce or meatballs | <input type="radio"/> Don't eat               |                                          |
| <b>Cheese</b>                                       | <input type="radio"/> Low Fat                       | <input type="radio"/> Not Low Fat                  | <input type="radio"/> Don't eat               |                                          |
| <b>Salad dressing</b>                               | <input type="radio"/> Low-Carb                      | <input type="radio"/> Low-fat                      | <input type="radio"/> Regular                 | <input type="radio"/> Don't use          |
| <b>Energy bars like Power Bar, Clif, Atkins</b>     | <input type="radio"/> Low-Carb, low sugar           | <input type="radio"/> Low-fat                      | <input type="radio"/> Regular                 | <input type="radio"/> Don't eat          |
| <b>Breakfast bars, cereal bars, or granola bars</b> | <input type="radio"/> Low-Carb, low sugar           | <input type="radio"/> Low-fat                      | <input type="radio"/> Regular                 | <input type="radio"/> Don't eat          |
| <b>Bread</b>                                        | <input type="radio"/> 100% whole wheat              | <input type="radio"/> Low-Carb                     | <input type="radio"/> Regular                 | <input type="radio"/> Don't eat          |
| <b>Tortillas</b>                                    | <input type="radio"/> Corn                          | <input type="radio"/> Flour                        | <input type="radio"/> Don't know or don't eat |                                          |
| <b>Chocolate candy or chocolate candy bars</b>      | <input type="radio"/> Low-Carb, low sugar           | <input type="radio"/> Low-fat                      | <input type="radio"/> Regular                 | <input type="radio"/> Don't eat          |
| <b>Cookies</b>                                      | <input type="radio"/> Low-Carb, low sugar           | <input type="radio"/> Low-fat                      | <input type="radio"/> Regular                 | <input type="radio"/> Don't eat          |
| <b>Cake, snack cakes, and other pastries</b>        | <input type="radio"/> Low-Carb, low sugar           | <input type="radio"/> Low-fat                      | <input type="radio"/> Regular                 | <input type="radio"/> Don't eat          |
| <b>Ice cream</b>                                    | <input type="radio"/> Low-Carb, low sugar           | <input type="radio"/> Low-fat or ice milk          | <input type="radio"/> Regular                 | <input type="radio"/> Don't eat          |
| <b>Jelly or jam</b>                                 | <input type="radio"/> Low-Carb, low sugar           | <input type="radio"/> Regular                      | <input type="radio"/> Don't use               |                                          |
| <b>Beef or pork</b>                                 | <input type="radio"/> Avoid eating the fat          | <input type="radio"/> Sometimes eat the fat        | <input type="radio"/> Often eat the fat       | <input type="radio"/> Don't eat          |
| <b>Chicken or Turkey</b>                            | <input type="radio"/> Avoid eating the skin         | <input type="radio"/> Sometimes eat the skin       | <input type="radio"/> Often eat the skin      | <input type="radio"/> Don't eat          |

**What kinds of fat or oil do you usually use in cooking? MARK ONLY ONE OR TWO**

|                                              |                                          |                                               |                                                |
|----------------------------------------------|------------------------------------------|-----------------------------------------------|------------------------------------------------|
| <input type="radio"/> Don't know, or Pam     | <input type="radio"/> Stick margarine    | <input type="radio"/> Corn oil, vegetable oil | <input type="radio"/> Lard, fatback, bacon fat |
| <input type="radio"/> Butter                 | <input type="radio"/> Soft tub margarine | <input type="radio"/> Olive oil or canola oil | <input type="radio"/> Crisco                   |
| <input type="radio"/> Butter/margarine blend | <input type="radio"/> Low-fat margarine  |                                               |                                                |

**If you eat cold cereals, what do you eat? Choose one or two that you eat most often. (If you usually just eat one kind, just choose one.)**

|                                                                                  |                                            |                                                                                      |
|----------------------------------------------------------------------------------|--------------------------------------------|--------------------------------------------------------------------------------------|
| <input type="radio"/> Low-carb cereals like Atkins, Low-Carb Special K           | <input type="radio"/> Total                | <input type="radio"/> Other fiber cereals like Raisin Bran, Fruit-n-Fiber            |
| <input type="radio"/> Cheerios, Grape Nuts, Shredded Wheat, Wheaties, Wheat Chex | <input type="radio"/> Fiber One            | <input type="radio"/> Sweetened cereals like Frosted Flakes, Froot Loops             |
|                                                                                  | <input type="radio"/> Product 19, Complete | <input type="radio"/> Other cold cereals, like Corn Flakes, Rice Krispies, Special K |
|                                                                                  | <input type="radio"/> All Bran, Bran Buds  |                                                                                      |
